# Supplementary material
Source: PubMed Central journal article supplement (PMC3430195)
Supplement: MCB.00062-12_zmb999109650so1.pdf [file MCB.00062-12_zmb999109650so1.pdf]

Supplementary Materials for **“The Hypersensitive Glucocorticoid Response Specifically Regulates Period 1 and Regulates Expression of Circadian Genes”**

Timothy E. Reddy<sup>1&</sup>, Jason Gertz<sup>1</sup>, Gregory E. Crawford<sup>2</sup>, Michael J. Garabedian<sup>3</sup> and Richard M. Myers<sup>1\*</sup>

<sup>1</sup>HudsonAlpha Institute for Biotechnology, Huntsville, AL, USA

<sup>2</sup>Institute for Genome Sciences & Policy, Duke University, Durham, NC, USA

<sup>3</sup>Departments of Microbiology and Urology, NYU School of Medicine, New York, NY, USA

<sup>&</sup>Current address: Department of Biostatistics & Bioinformatics and Institute for Genome Sciences & Policy, Duke University, Durham, NC, USA

\* Corresponding author

HudsonAlpha Institute for Biotechnology  
601 Genome Way  
Huntsville, Alabama 35806  
Email: rmyers@hudsonalpha.org  
Telephone: 256-327-0431  
FAX 256-327-0978

**Supplementary Figures:****Figure S1**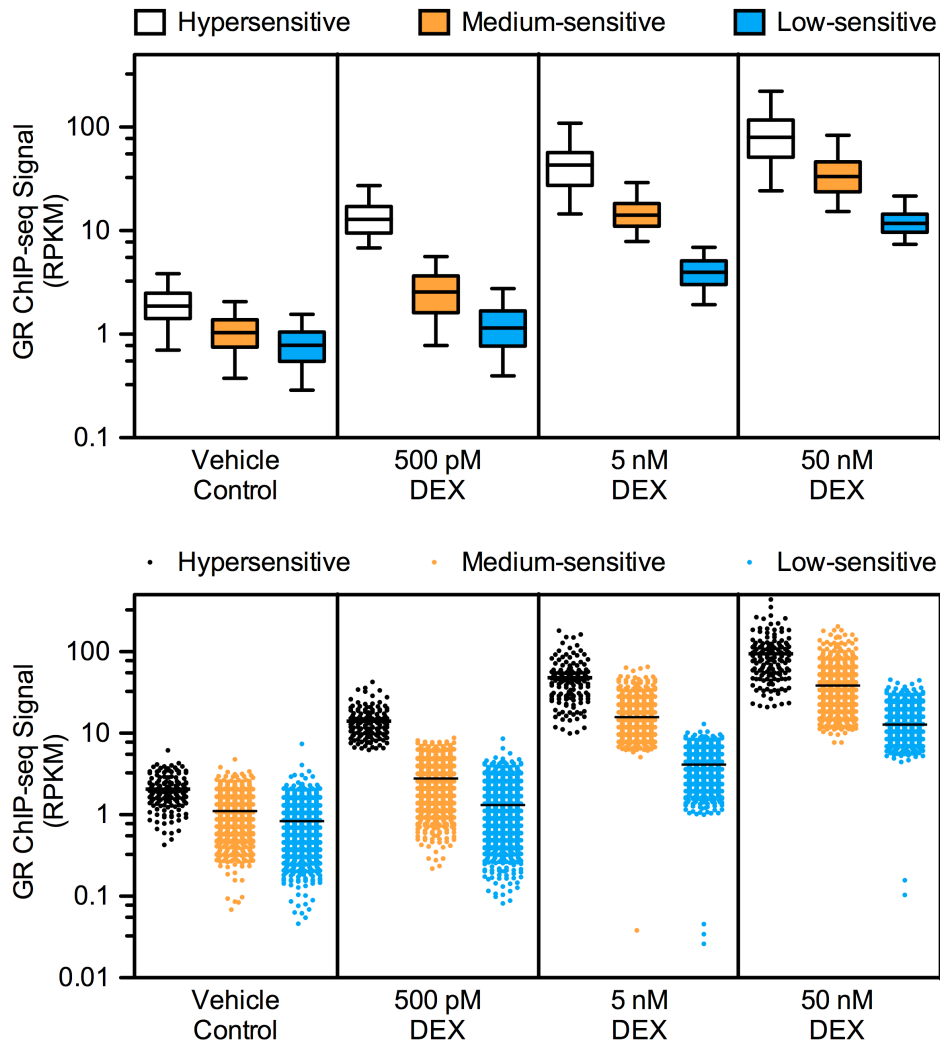

Figure S1: Distribution of ChIP-seq signal for each class of GR binding site. In each panel, the x-axis indicates the concentration of DEX used. Within each panel, the distribution of ChIP-seq signal is shown for the hypersensitive (white/black), medium-sensitive (orange), and low-sensitive GR (blue) GR binding sites. Whiskers in the top plot indicate the 5%-95% range of the data. In the bottom plot, each point is a GR binding site.

**Figure S2**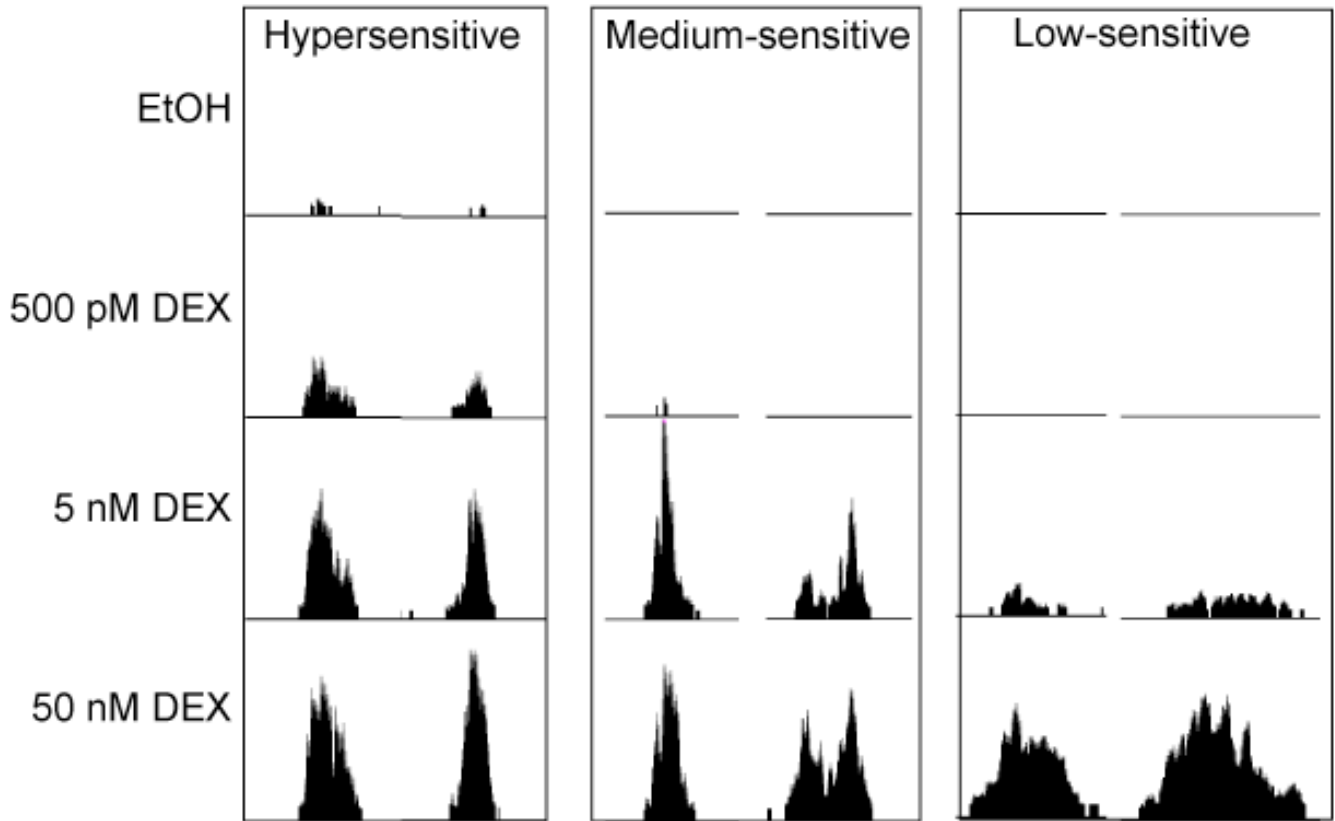

Figure S2: Examples of hypersensitive, medium-sensitive, and low-sensitive GR binding sites from the genome. Sites were selected such that they have similar ChIP-seq signal strength at 50 nM DEX.

**Figure S3**

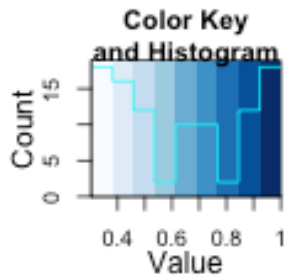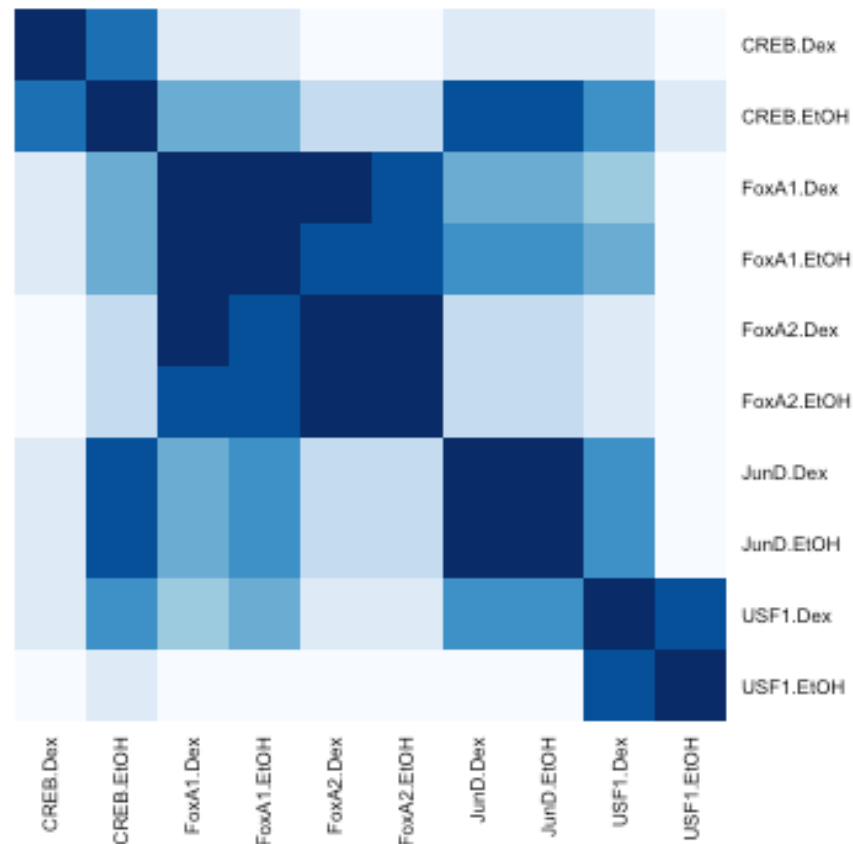

Pearson correlation of ChIP-seq signal, measured in aligned reads per kilobase of genomic sequence and per million aligned reads (RPKM) within 5 kb of genomic transcription start sites. ChIP-seq signal for the same factor but under different conditions were highly correlated, as was ChIP-seq signal between *FOXA1* and *FOXA2*. Correlated occupancy was also observed between *JUND* and *CREB*, and may be indicative of co-regulation between the two factors.

**Figure S4:**

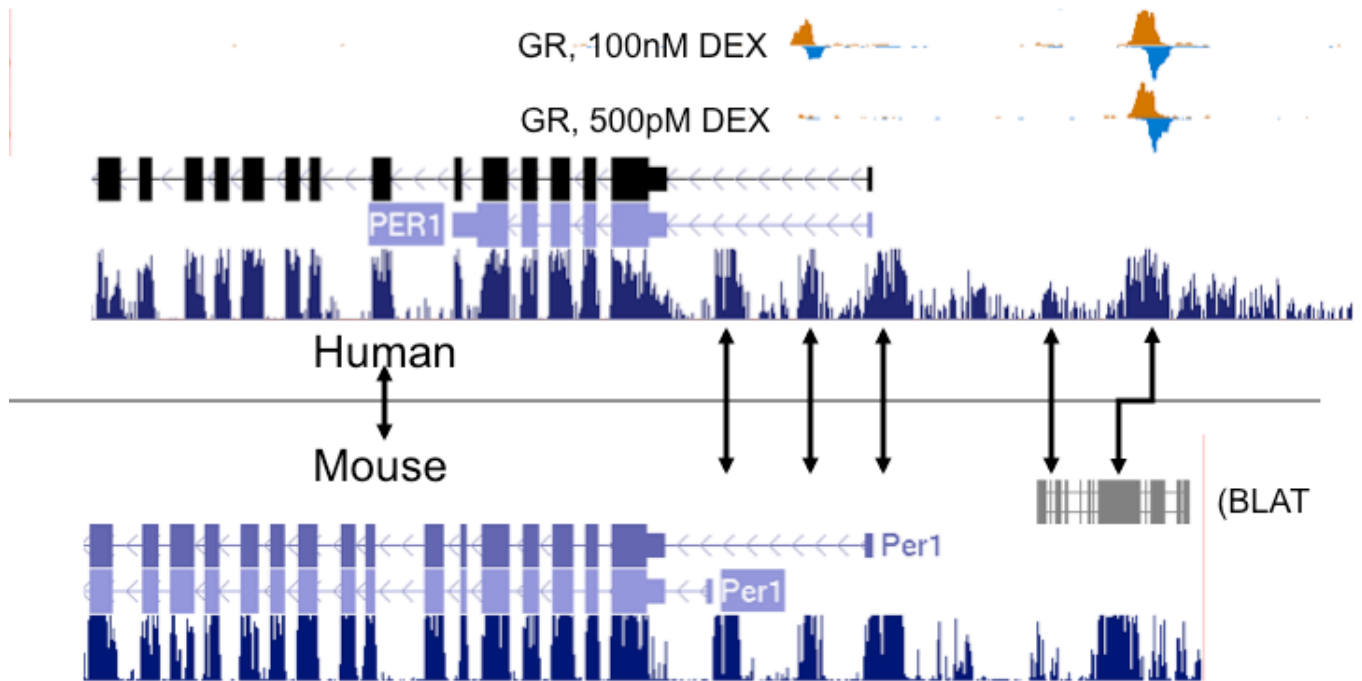

Conservation of GR binding sites surrounding PER1 between human and mouse. Both the intronic and upstream GR binding sites occur in regions of conservation (indicated by blue graph beneath gene diagrams). In mouse, the upstream GR binding site is closer to the PER1 transcription start site.

**Figure S5:**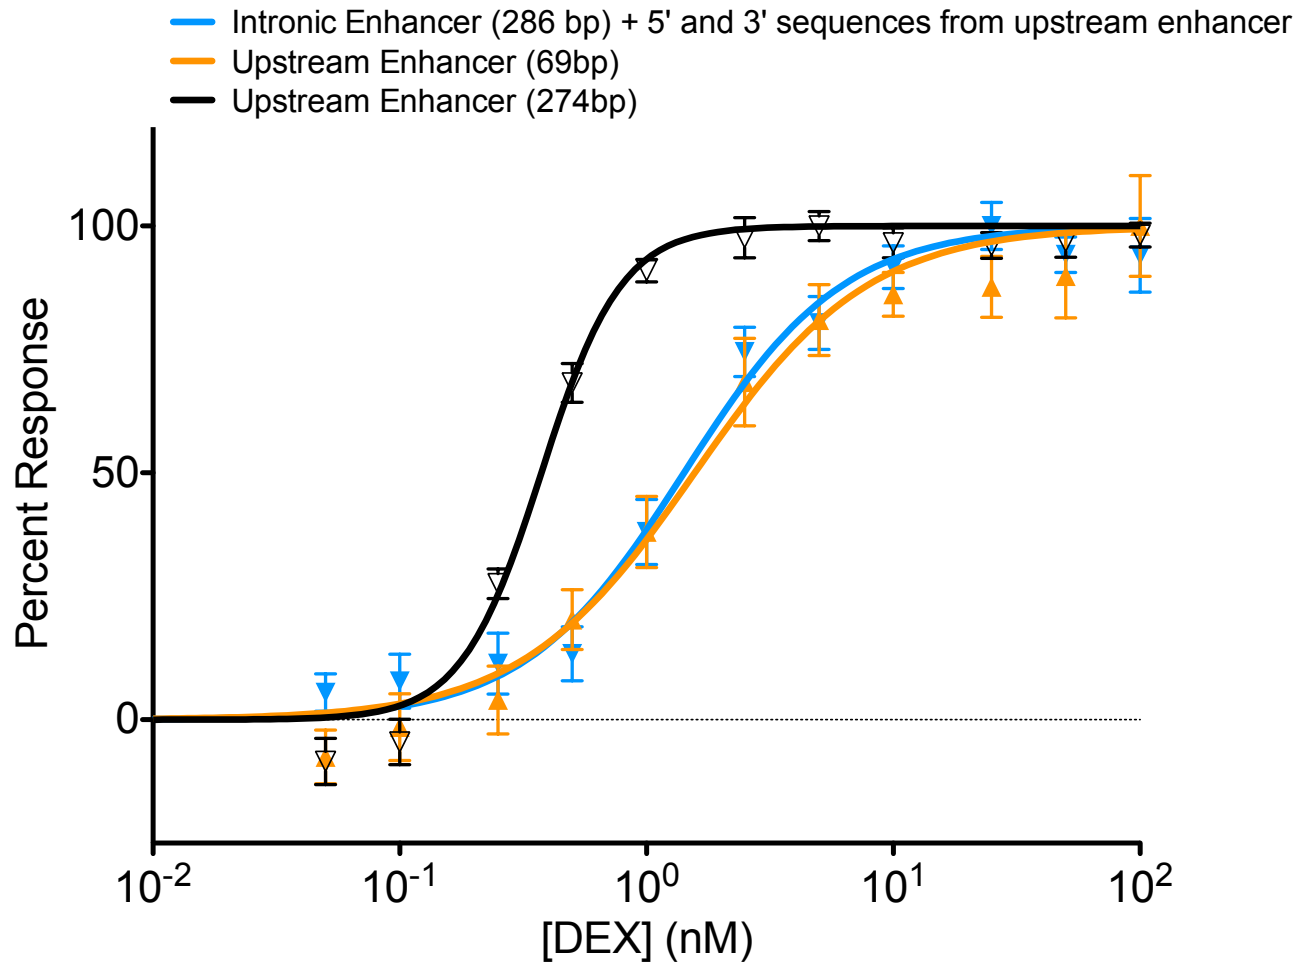

Dose response of enhancer element derived from the PER1-intronic (normally-sensitive) GR binding site, but with flanking sequences mutated to match the sequence of the PER1-upstream (hypersensitive) enhancer region. The nucleotide sequence of the modified intronic enhancer region is listed below, where blue indicates the GR binding sequence, and bold and underlined sequence indicates sequences that match the corresponding location relative to the GR binding sequence in the hypersensitive enhancer element.

```

CCGGTCTTCTTGCTCGTTACTCGAGGGGCCCCAGGTTTGCCCCGGTACCAGGACCCTAT
TAGGCTTTTCAGCGCTCCCCGTGTCTCTGTTCTCCAGTCCCTGGCCCTGCGCCGCCTGTG
ATGTTGGGCCACCAGCCAATAGAACATCCCGTTCCCAGCGCTGCTGGCCGCCGCCCTC
CACAACCTGGCCGCCTCCCAAGGCGCTCAGAAAATGCTCAGTAGTAGGGGTGTGGTTGG
ACGGGGAGTAGGGGAAGAAAGATCTGTTGGCTGTTGTGTGTCTTCT

```

**Figure S6:**

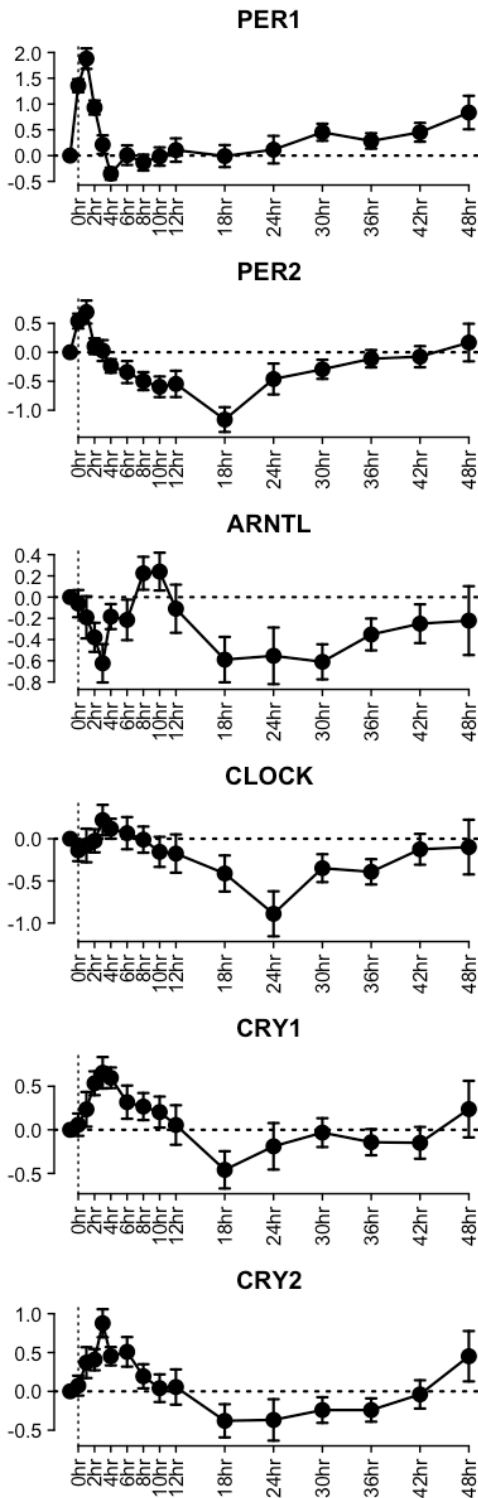

Figure S6: 48 time-course after treatment with 0.5 nM DEX for one hour, followed by removing the DEX for the number of hours indicated on the x-axis. The data here combine experiments shown in Figure 7 as well as an additional 6 biological replicates (4 technical replicates ea.) of the following time points: No Dex, 0 hr, 1 hr, 3 hr, 6 hr, 12 hr, 18 hr, 24 hr, 30 hr, 36 hr, 42 hr, and 48 hr). Expression of each gene was measured using TaqMan RT-QPCR assays. Expression was normalized both to GAPDH and GR expression, both of which we expect to be constant, using linear regression. The y-axis shows the log-fold expression change relative to no DEX treatment. Error bars indicate 95% confidence intervals on the fold changes.

**Supplementary Tables:****Table S1: Numbers of dose-specific GR binding sites**

| [DEX] (nM) | Aligned Sequence Reads |            |
|------------|------------------------|------------|
|            | Rep1                   | Rep2       |
| 0          | 18,022,468             | 18,412,092 |
| 0.5        | 16,799,279             | 12,740,831 |
| 5          | 18,078,035             | 18,349,363 |
| 50         | 16,504,811             | 14,615,434 |

**Table S2: Dose-specific GR Binding Sites**

(Table included as external Excel spreadsheet)

**Table S3: Numbers of dose-specific GR binding sites**

| Class  | # binding sites | # w/ GRE<br>(fraction) | # w/ rev. GRE<br>(fraction) | Fold enrichment* |
|--------|-----------------|------------------------|-----------------------------|------------------|
| 0.5 nM | 145             | 86 (0.59)              | 24 (0.17)                   | 3.58             |
| 5 nM   | 1447            | 891 (0.62)             | 250 (0.17)                  | 3.56             |
| 50 nM  | 4295            | 2466 (0.57)            | 685 (0.16)                  | 3.60             |

| Class  | # binding sites | # GREs | GREs/site   |
|--------|-----------------|--------|-------------|
| 0.5 nM | 145             | 155    | 1.068965517 |
| 5 nM   | 1447            | 1639   | 1.132688321 |
| 50 nM  | 4295            | 4647   | 1.081955763 |

\* Fold enrichment is defined as the number of sites with a GRE divided by the number of sites with a reverse GRE.

**Table S4: Aligned Sequencing Reads for CHIP-seq of GR Co-factors**

| Factor | Antibody* | Aligned Sequencing Reads |            |                 |                 |
|--------|-----------|--------------------------|------------|-----------------|-----------------|
|        |           | EtOH, Rep1               | EtOH, Rep2 | 100nM DEX, Rep1 | 100nM DEX, Rep2 |
| FoxA1  | sc-101058 | 22,847,803               | 18,192,774 | 23,260,471      | 16,932,805      |
| FoxA2  | sc-6554   | 27,442,050               | 54,840,111 | 42,044,987      | 14,820,581      |
| CREB   | sc-240    | 16,603,386               | 17,608,941 | 24,436,090      | 16,164,577      |
| JunD   | sc-74     | 18,776,549               | 25,296,785 | 21,053,673      | 16,120,795      |
| USF1   | sc-229    | 15,087,543               | 12,330,014 | 20,814,482      | 11,521,793      |

\* All antibodies were supplied by Santa Cruz Biotechnology

|                      | EtOH       | 100nM DEX  |
|----------------------|------------|------------|
| Input Control, 1 PCR | 18,140,684 | 13,273,349 |



**Table S5: ChIP-seq Determined Binding Sites for GR Cofactors**

(Table included as external Excel spreadsheet)

**Table S6: Gene-expression Changes in Response to Low-dose DEX**

(Table included as external Excel spreadsheet)

**Supplementary Methods:****Mutation screening of hypersensitive GR enhancer upstream of PER1**

To screen the entire hypersensitive GR enhancer for mutations that impact hypersensitivity, we synthesized wild-type and 29 mutant versions of a 235 bp regions surrounding the hypersensitive GR binding sites upstream of PER1 (Genscript). Each mutant had 10 nucleotides of the wild type sequence replaced with the 10 bp nucleotide sequence ACACACACAC. The mutations were introduced every 7 bp along the enhancer so that 6 bp of every mutant sequence overlapped another mutant enhancer. The enhancer sequences were subcloned from a cloning vector into a pGL4.24 luciferase reporter vector with a minimal promoter (pGL4.14 from Promega) and verified with Sanger sequencing. Each construct was then minipreped, and transfected into A549 cells, assayed in response to increasing concentrations of DEX, and analyzed as described in the main text. The exact sequence of each enhancer used is as follows:

&gt;Wild-type

```
GGCCTAACTGGCCGGGGGGAGGTGTGGGGAGGGGGCCCCCTTCTACTAATCCTCTCTCCA
GGAATCCCTGGCTTTGGGACAGGACGGCTGTCGTTTTGTTGGGGGAGGCGCCCAGGCTGGG
TGCATGTCCTGGGCCACCAGCCAAGAGAACATGATGTTCCCAAGTGCGCTGGCCGCCGCC
TCTCGGGCTGGCCGCCTCCCAAACCGCTGCCTCTCCAGTGGCCTCGGCGGCC
```

&gt;mut\_2

```
GGCCTAACTGGCCGGGGGGAACACACACACGGGGGGCCCCCTTCTACTAATCCTCTCTCCA
GGAATCCCTGGCTTTGGGACAGGACGGCTGTCGTTTTGTTGGGGGAGGCGCCCAGGCTGGG
TGCATGTCCTGGGCCACCAGCCAAGAGAACATGATGTTCCCAAGTGCGCTGGCCGCCGCC
TCTCGGGCTGGCCGCCTCCCAAACCGCTGCCTCTCCAGTGGCCTCGGCGGCC
```

&gt;mut\_3

```
GGCCTAACTGGCCGGGGGGAGGTGTGGACACACACACCCCTTCTACTAATCCTCTCTCCA
GGAATCCCTGGCTTTGGGACAGGACGGCTGTCGTTTTGTTGGGGGAGGCGCCCAGGCTGGG
TGCATGTCCTGGGCCACCAGCCAAGAGAACATGATGTTCCCAAGTGCGCTGGCCGCCGCC
TCTCGGGCTGGCCGCCTCCCAAACCGCTGCCTCTCCAGTGGCCTCGGCGGCC
```

&gt;mut\_4

```
GGCCTAACTGGCCGGGGGGAGGTGTGGGGAGGGGACACACACACTACTAATCCTCTCTCC
AGGAATCCCTGGCTTTGGGACAGGACGGCTGTCGTTTTGTTGGGGGAGGCGCCCAGGCTGG
GTGCATGTCCTGGGCCACCAGCCAAGAGAACATGATGTTCCCAAGTGCGCTGGCCGCCGCC
CTCTCGGGCTGGCCGCCTCCCAAACCGCTGCCTCTCCAGTGGCCTCGGCGGCC
```

&gt;mut\_5

GGCCTAACTGGCCGGGGGGAGGTGTGGGGAGGGGGCCCCCTACACACACACCCTCTCTCC  
AGGAATCCCTGGCTTTGGGACAGGACGGCTGTCGTTTTGTTGGGGGAGGCGCCCAGGCTGG  
GTGCATGTCCTGGGCCACCAGCCAAGAGAACATGATGTTCCCAAGTGCCTGGCCGCCGCC  
CTCTCGGGCTGGCCGCCTCCCAAACCGCTGCCTCTCCAGTGGCCTCGGCGGCC

>mut\_6

GGCCTAACTGGCCGGGGGGAGGTGTGGGGAGGGGGCCCCCTTCTACTACACACACACC  
AGGAATCCCTGGCTTTGGGACAGGACGGCTGTCGTTTTGTTGGGGGAGGCGCCCAGGCTGG  
GTGCATGTCCTGGGCCACCAGCCAAGAGAACATGATGTTCCCAAGTGCCTGGCCGCCGCC  
CTCTCGGGCTGGCCGCCTCCCAAACCGCTGCCTCTCCAGTGGCCTCGGCGGCC

>mut\_7

GGCCTAACTGGCCGGGGGGAGGTGTGGGGAGGGGGCCCCCTTCTACTAATCCTCACACA  
CACACTCCCTGGCTTTGGGACAGGACGGCTGTCGTTTTGTTGGGGGAGGCGCCCAGGCTGG  
GTGCATGTCCTGGGCCACCAGCCAAGAGAACATGATGTTCCCAAGTGCCTGGCCGCCGCC  
CTCTCGGGCTGGCCGCCTCCCAAACCGCTGCCTCTCCAGTGGCCTCGGCGGCC

>mut\_8

GGCCTAACTGGCCGGGGGGAGGTGTGGGGAGGGGGCCCCCTTCTACTAATCCTCTCTCCA  
GACACACACACTTTGGGACAGGACGGCTGTCGTTTTGTTGGGGGAGGCGCCCAGGCTGG  
GTGCATGTCCTGGGCCACCAGCCAAGAGAACATGATGTTCCCAAGTGCCTGGCCGCCGCC  
CTCTCGGGCTGGCCGCCTCCCAAACCGCTGCCTCTCCAGTGGCCTCGGCGGCC

>mut\_9

GGCCTAACTGGCCGGGGGGAGGTGTGGGGAGGGGGCCCCCTTCTACTAATCCTCTCTCCA  
GGAATCCCACACACACACAGGACGGCTGTCGTTTTGTTGGGGGAGGCGCCCAGGCTGG  
GTGCATGTCCTGGGCCACCAGCCAAGAGAACATGATGTTCCCAAGTGCCTGGCCGCCGCC  
CTCTCGGGCTGGCCGCCTCCCAAACCGCTGCCTCTCCAGTGGCCTCGGCGGCC

>mut\_10

GGCCTAACTGGCCGGGGGGAGGTGTGGGGAGGGGGCCCCCTTCTACTAATCCTCTCTCCA  
GGAATCCCTGGCTTTACACACACACAGGCTGTCGTTTTGTTGGGGGAGGCGCCCAGGCTGGG  
TGCATGTCCTGGGCCACCAGCCAAGAGAACATGATGTTCCCAAGTGCCTGGCCGCCGCC  
TCTCGGGCTGGCCGCCTCCCAAACCGCTGCCTCTCCAGTGGCCTCGGCGGCC

>mut\_11

GGCCTAACTGGCCGGGGGGAGGTGTGGGGAGGGGGCCCCCTTCTACTAATCCTCTCTCCA  
GGAATCCCTGGCTTTGGGACAGACACACACAGTTTTGTGGGGGAGGCGCCCAGGCTGG  
GTGCATGTCCTGGGCCACCAGCCAAGAGAACATGATGTTCCCAAGTGCCTGGCCGCCGCC  
CTCTCGGGCTGGCCGCCTCCCAAACCGCTGCCTCTCCAGTGGCCTCGGCGGCC

>mut\_12

GGCCTAACTGGCCGGGGGGAGGTGTGGGGAGGGGGCCCCCTTCTACTAATCCTCTCTCCA  
GGAATCCCTGGCTTTGGGACAGGACGGCTACACACACACTGGGGGAGGCGCCCAGGCTGG  
GTGCATGTCCTGGGCCACCAGCCAAGAGAACATGATGTTCCCAAGTGCCTGGCCGCCGCC  
CTCTCGGGCTGGCCGCCTCCCAAACCGCTGCCTCTCCAGTGGCCTCGGCGGCC

>mut\_13

GGCCTAACTGGCCGGGGGGAGGTGTGGGGAGGGGGCCCCCTTCTACTAATCCTCTCTCCA  
GGAATCCCTGGCTTTGGGACAGGACGGCTGTCGTTTACACACACACGGCGCCCAGGCTGG  
GTGCATGTCCTGGGCCACCAGCCAAGAGAACATGATGTTCCCAAGTGCCTGGCCGCCGCC  
CTCTCGGGCTGGCCGCCTCCCAAACCGCTGCCTCTCCAGTGGCCTCGGCGGCC

>mut\_14

GGCCTAACTGGCCGGGGGGAGGTGTGGGGAGGGGGCCCCCTTCCTACTAATCCTCTCTCCA  
GGAATCCCTGGCTTTGGGACAGGACGGCTGTCGTTTTGTTGGGGACACACACACAGGCTGGG  
TGCATGTCCTGGGCCACCAGCCAAGAGAACATGATGTTCCCAAGTGCGCTGGCCGCCGCC  
TCTCGGGCTGGCCGCCTCCCAAACCGCTGCCTCTCCAGTGGCCTCGGCGGCC

>mut\_15

GGCCTAACTGGCCGGGGGGAGGTGTGGGGAGGGGGCCCCCTTCCTACTAATCCTCTCTCCA  
GGAATCCCTGGCTTTGGGACAGGACGGCTGTCGTTTTGTTGGGGGAGGCGACACACACAC  
GTGCATGTCCTGGGCCACCAGCCAAGAGAACATGATGTTCCCAAGTGCGCTGGCCGCCGCC  
CTCTCGGGCTGGCCGCCTCCCAAACCGCTGCCTCTCCAGTGGCCTCGGCGGCC

>mut\_16

GGCCTAACTGGCCGGGGGGAGGTGTGGGGAGGGGGCCCCCTTCCTACTAATCCTCTCTCCA  
GGAATCCCTGGCTTTGGGACAGGACGGCTGTCGTTTTGTTGGGGGAGGCGCCAGGCACAC  
ACACACTCCTGGGCCACCAGCCAAGAGAACATGATGTTCCCAAGTGCGCTGGCCGCCGCC  
CTCTCGGGCTGGCCGCCTCCCAAACCGCTGCCTCTCCAGTGGCCTCGGCGGCC

>mut\_17

GGCCTAACTGGCCGGGGGGAGGTGTGGGGAGGGGGCCCCCTTCCTACTAATCCTCTCTCCA  
GGAATCCCTGGCTTTGGGACAGGACGGCTGTCGTTTTGTTGGGGGAGGCGCCAGGCTGGG  
TGCACACACACACCCACCAGCCAAGAGAACATGATGTTCCCAAGTGCGCTGGCCGCCGCC  
CTCTCGGGCTGGCCGCCTCCCAAACCGCTGCCTCTCCAGTGGCCTCGGCGGCC

>mut\_18

GGCCTAACTGGCCGGGGGGAGGTGTGGGGAGGGGGCCCCCTTCCTACTAATCCTCTCTCCA  
GGAATCCCTGGCTTTGGGACAGGACGGCTGTCGTTTTGTTGGGGGAGGCGCCAGGCTGGG  
TGCATGTCCTACACACACACCCAAGAGAACATGATGTTCCCAAGTGCGCTGGCCGCCGCC  
TCTCGGGCTGGCCGCCTCCCAAACCGCTGCCTCTCCAGTGGCCTCGGCGGCC

>mut\_19

GGCCTAACTGGCCGGGGGGAGGTGTGGGGAGGGGGCCCCCTTCCTACTAATCCTCTCTCCA  
GGAATCCCTGGCTTTGGGACAGGACGGCTGTCGTTTTGTTGGGGGAGGCGCCAGGCTGGG  
TGCATGTCCTGGGCCACACACACACACAACATGATGTTCCCAAGTGCGCTGGCCGCCGCC  
TCTCGGGCTGGCCGCCTCCCAAACCGCTGCCTCTCCAGTGGCCTCGGCGGCC

>mut\_20

GGCCTAACTGGCCGGGGGGAGGTGTGGGGAGGGGGCCCCCTTCCTACTAATCCTCTCTCCA  
GGAATCCCTGGCTTTGGGACAGGACGGCTGTCGTTTTGTTGGGGGAGGCGCCAGGCTGGG  
TGCATGTCCTGGGCCACCAGCCAACACACACACTGTTCCCAAGTGCGCTGGCCGCCGCC  
TCTCGGGCTGGCCGCCTCCCAAACCGCTGCCTCTCCAGTGGCCTCGGCGGCC

>mut\_21

GGCCTAACTGGCCGGGGGGAGGTGTGGGGAGGGGGCCCCCTTCCTACTAATCCTCTCTCCA  
GGAATCCCTGGCTTTGGGACAGGACGGCTGTCGTTTTGTTGGGGGAGGCGCCAGGCTGGG  
TGCATGTCCTGGGCCACCAGCCAAGAGAACACACACACAAGTGCGCTGGCCGCCGCC  
CTCTCGGGCTGGCCGCCTCCCAAACCGCTGCCTCTCCAGTGGCCTCGGCGGCC

>mut\_22

GGCCTAACTGGCCGGGGGGAGGTGTGGGGAGGGGGCCCCCTTCCTACTAATCCTCTCTCCA  
GGAATCCCTGGCTTTGGGACAGGACGGCTGTCGTTTTGTTGGGGGAGGCGCCAGGCTGGG  
TGCATGTCCTGGGCCACCAGCCAAGAGAACATGATGTTACACACACACCTGGCCGCCGCC  
CTCTCGGGCTGGCCGCCTCCCAAACCGCTGCCTCTCCAGTGGCCTCGGCGGCC

>mut\_23

GGCCTAACTGGCCGGGGGGAGGTGTGGGGAGGGGGCCCCCTTCCTACTAATCCTCTCTCCA  
GGAATCCCTGGCTTTGGGACAGGACGGCTGTCGTTTTGTTGGGGGAGGCGCCCAGGCTGGG  
TGCATGTCCTGGGCCACCAGCCAAGAGAACATGATGTTCCCAAGT**ACACACAC**ACCCGCC  
CTCTCGGGCTGGCCGCCTCCCAAACCGCTGCCTCTCCAGTGGCCTCGGCGGCC

>mut\_24

GGCCTAACTGGCCGGGGGGAGGTGTGGGGAGGGGGCCCCCTTCCTACTAATCCTCTCTCCA  
GGAATCCCTGGCTTTGGGACAGGACGGCTGTCGTTTTGTTGGGGGAGGCGCCCAGGCTGGG  
TGCATGTCCTGGGCCACCAGCCAAGAGAACATGATGTTCCCAAGT**ACACACAC**ACCCGCC  
**ACCT**CGGGCTGGCCGCCTCCCAAACCGCTGCCTCTCCAGTGGCCTCGGCGGCC

>mut\_25

GGCCTAACTGGCCGGGGGGAGGTGTGGGGAGGGGGCCCCCTTCCTACTAATCCTCTCTCCA  
GGAATCCCTGGCTTTGGGACAGGACGGCTGTCGTTTTGTTGGGGGAGGCGCCCAGGCTGGG  
TGCATGTCCTGGGCCACCAGCCAAGAGAACATGATGTTCCCAAGT**ACACAC**ACTGGCCGCC  
**ACACAC**ACTGGCCGCCTCCCAAACCGCTGCCTCTCCAGTGGCCTCGGCGGCC

>mut\_26

GGCCTAACTGGCCGGGGGGAGGTGTGGGGAGGGGGCCCCCTTCCTACTAATCCTCTCTCCA  
GGAATCCCTGGCTTTGGGACAGGACGGCTGTCGTTTTGTTGGGGGAGGCGCCCAGGCTGGG  
TGCATGTCCTGGGCCACCAGCCAAGAGAACATGATGTTCCCAAGT**ACACAC**ACTGGCCGCC  
**ACACAC**ACTGGCCGCCTCCCAAACCGCTGCCTCTCCAGTGGCCTCGGCGGCC

>mut\_27

GGCCTAACTGGCCGGGGGGAGGTGTGGGGAGGGGGCCCCCTTCCTACTAATCCTCTCTCCA  
GGAATCCCTGGCTTTGGGACAGGACGGCTGTCGTTTTGTTGGGGGAGGCGCCCAGGCTGGG  
TGCATGTCCTGGGCCACCAGCCAAGAGAACATGATGTTCCCAAGT**ACACAC**ACTGGCCGCC  
**ACACAC**ACTGGCCGCCTCCCAAACCGCTGCCTCTCCAGTGGCCTCGGCGGCC

>mut\_28

GGCCTAACTGGCCGGGGGGAGGTGTGGGGAGGGGGCCCCCTTCCTACTAATCCTCTCTCCA  
GGAATCCCTGGCTTTGGGACAGGACGGCTGTCGTTTTGTTGGGGGAGGCGCCCAGGCTGGG  
TGCATGTCCTGGGCCACCAGCCAAGAGAACATGATGTTCCCAAGT**ACACAC**ACTGGCCGCC  
**ACACAC**ACTGGCCGCCTCCCAAACCGCTGCCTCTCCAGTGGCCTCGGCGGCC

>mut\_29

GGCCTAACTGGCCGGGGGGAGGTGTGGGGAGGGGGCCCCCTTCCTACTAATCCTCTCTCCA  
GGAATCCCTGGCTTTGGGACAGGACGGCTGTCGTTTTGTTGGGGGAGGCGCCCAGGCTGGG  
TGCATGTCCTGGGCCACCAGCCAAGAGAACATGATGTTCCCAAGT**ACACAC**ACTGGCCGCC  
**ACACAC**ACTGGCCGCCTCCCAAACCGCTGCCTCTCCAGTGGCCTCGGCGGCC

>mut\_30

GGCCTAACTGGCCGGGGGGAGGTGTGGGGAGGGGGCCCCCTTCCTACTAATCCTCTCTCCA  
GGAATCCCTGGCTTTGGGACAGGACGGCTGTCGTTTTGTTGGGGGAGGCGCCCAGGCTGGG  
TGCATGTCCTGGGCCACCAGCCAAGAGAACATGATGTTCCCAAGT**ACACAC**ACTGGCCGCC  
**ACACAC**ACTGGCCGCCTCCCAAACCGCTGCCT**ACACAC**GGCCTCGGCGGCC
